# Supplementary material for: Effect of Possible Osteoporosis on Parenchymal-Type Hemorrhagic Transformation in Patients with Cardioembolic Stroke
Source: MDPI journal article supplement (doi:10.3390/jcm10112526), 2021-06-07
Supplement: s1 [file s1]

## Supplementary Materials

**Supplemental Table S1.** Characteristics of the study individuals focusing on the PH-type HT and hypothetical BMD classification according to three different age groups

| Characteristics                             | <65 years | 65–79 years | ≥80 years  | Total      | p      |
|---------------------------------------------|-----------|-------------|------------|------------|--------|
| Number                                      | 123       | 291         | 186        | 600        |        |
| PH-type HT (+), n (%)                       | 7 (5.7)   | 27 (9.3)    | 8 (4.3)    | 42 (7.0)   | 0.094  |
| Classification of mean skull HU, n (%)      |           |             |            |            | <0.001 |
| Hypothetical normal (>712.4)                | 80 (65.0) | 151 (51.9)  | 53 (28.5)  | 284 (47.3) |        |
| Hypothetical osteopenia (>611.7 and ≤712.4) | 19 (15.4) | 26 (8.9)    | 19 (10.2)  | 64 (10.7)  |        |
| Hypothetical osteoporosis (≤611.7)          | 24 (19.5) | 114 (39.2)  | 114 (61.3) | 252 (42.0) |        |

PH, parenchymal hematoma; HT, hemorrhagic transformation; BMD, bone mineral density; HU, Hounsfield unit

**Supplemental Table S2.** Univariate Cox regression analyses of PH-type HT development after cardioembolic stroke according to hypothetical BMD classification based on different age groups

|                                             | <65 years (n=123) |       | 65–79 years (n=291) |       | ≥80 years (n=186) |       |
|---------------------------------------------|-------------------|-------|---------------------|-------|-------------------|-------|
| Variable                                    | HR (95% CI)       | p     | HR (95% CI)         | p     | HR (95% CI)       | p     |
| Classification of mean skull HU, n (%)      |                   |       |                     |       |                   |       |
| Hypothetical normal (>712.4)                | Reference         |       | Reference           |       | Reference         |       |
| Hypothetical osteopenia (>611.7 and ≤712.4) | 3.59 (0.65–19.97) | 0.144 | 0.62 (0.08–4.91)    | 0.652 | 0.00 (0.00–0.00)  | 0.986 |
| Hypothetical osteoporosis (≤611.7)          | 2.18 (0.23–20.93) | 0.499 | 2.28 (1.02–5.13)    | 0.045 | 3.09 (0.38–25.10) | 0.292 |

PH, parenchymal hematoma; HT, hemorrhagic transformation; BMD, bone mineral density; HR, hazard ratio; CI, confidence interval; HU=Hounsfield unit

**Supplemental Table S3.** Univariate Cox regression analyses of potential predictive factors of PH-type HT in patients with cardioembolic stroke

| Variable                                    | HR (95% CI)      | p      |
|---------------------------------------------|------------------|--------|
| Sex                                         |                  |        |
| Male                                        | 1.13 (0.61–2.08) | 0.700  |
| Female                                      | Reference        |        |
| Age (per 1-year increase)                   | 1.00 (0.97–1.03) | 0.996  |
| BMI (per 1-unit increase)                   | 0.97 (0.90–1.05) | 0.462  |
| NIHSS at admission (per 1-point increase)   | 1.07 (1.03–1.10) | <0.001 |
| Cerebral infarct volume (per 1 cc increase) | 1.01 (1.00–1.01) | <0.001 |
| tPA use                                     |                  |        |
| No                                          | Reference        |        |
| Yes                                         | 1.55 (0.80–3.04) | 0.198  |
| Thrombocytopenia at admission               |                  |        |
| No                                          | Reference        |        |
| Yes                                         | 1.81 (0.89–3.69) | 0.102  |
| Classification of mean skull HU             |                  |        |
| Hypothetical normal                         | Reference        |        |
| Hypothetical osteopenia                     | 1.04 (0.30–3.64) | 0.946  |
| Hypothetical osteoporosis                   | 2.13 (1.11–4.09) | 0.024  |
| Previous stroke history                     |                  |        |
| No                                          | Reference        |        |
| Yes                                         | 0.54 (0.25–1.17) | 0.116  |
| Hypertension                                |                  |        |
| No                                          | Reference        |        |
| Yes                                         | 1.20 (0.63–2.28) | 0.575  |
| Diabetes                                    |                  |        |
| No                                          | Reference        |        |
| Yes                                         | 1.35 (0.72–2.51) | 0.352  |
| Current smoking                             |                  |        |
| No                                          | Reference        |        |
| Yes                                         | 1.13 (0.50–2.54) | 0.771  |
| Hyperlipidemia                              |                  |        |
| No                                          | Reference        |        |

|                          |                  |       |
|--------------------------|------------------|-------|
| Yes                      | 1.25 (0.53–2.96) | 0.619 |
| Prior antithrombotic use |                  |       |
| No                       | Reference        |       |
| Yes                      | 0.65 (0.29–1.46) | 0.295 |

PH, parenchymal hematoma; HT, hemorrhagic transformation; HR, hazard ratio; CI, confidence interval; BMI, body mass index; NIHSS, National Institutes of Health Stroke Scale; tPA, tissue plasminogen activator; HU, Hounsfield unit

**Supplemental Table S4.** Uni- and multivariate Cox regression analyses of potential predictive factors for PH-type HT among female patients with cardioembolic stroke

| Variable                                    | Univariate       |        | Multivariate     |       |
|---------------------------------------------|------------------|--------|------------------|-------|
|                                             | HR (95% CI)      | p      | HR (95% CI)      | p     |
| Age (per 1-year increase)                   | 0.99 (0.95–1.03) | 0.498  | 0.96 (0.91–1.01) | 0.100 |
| BMI (per 1-unit increase)                   | 0.98 (0.89–1.08) | 0.735  | 0.97 (0.87–1.09) | 0.606 |
| NIHSS at admission (per 1-point increase)   | 1.05 (1.00–1.11) | 0.052  | 1.03 (0.97–1.10) | 0.302 |
| Cerebral infarct volume (per 1 cc increase) | 1.01 (1.00–1.01) | <0.001 | 1.00 (1.00–1.01) | 0.017 |
| tPA use                                     |                  |        |                  |       |
| No                                          | Reference        |        | Reference        |       |
| Yes                                         | 1.15 (0.43–3.09) | 0.778  | 1.00 (0.35–2.82) | 0.993 |
| Thrombocytopenia at admission               |                  |        |                  |       |
| No                                          | Reference        |        | Reference        |       |
| Yes                                         | 2.75 (1.09–6.95) | 0.033  | 1.66 (0.59–4.69) | 0.343 |
| Classification of mean skull HU             |                  |        |                  |       |
| Hypothetical normal                         | Reference        |        | Reference        |       |
| Hypothetical osteopenia                     | 0.53 (0.06–4.53) | 0.562  | 0.57 (0.07–5.11) | 0.619 |
| Hypothetical osteoporosis                   | 1.45 (0.54–3.92) | 0.459  | 1.77 (0.54–5.80) | 0.348 |
| Previous stroke history                     |                  |        |                  |       |
| No                                          | Reference        |        | Reference        |       |
| Yes                                         | 0.63 (0.23–1.70) | 0.359  | 0.54 (0.18–1.60) | 0.266 |
| Hypertension                                |                  |        |                  |       |
| No                                          | Reference        |        | Reference        |       |
| Yes                                         | 1.50 (0.59–3.77) | 0.393  | 1.53 (0.59–3.99) | 0.380 |
| Diabetes                                    |                  |        |                  |       |
| No                                          | Reference        |        | Reference        |       |
| Yes                                         | 1.68 (0.75–3.76) | 0.204  | 1.73 (0.74–4.03) | 0.206 |

|                          |                   |       |                  |       |
|--------------------------|-------------------|-------|------------------|-------|
| Current smoking          |                   |       |                  |       |
| No                       | Reference         |       | Reference        |       |
| Yes                      | 0.05 (0.0–1299.6) | 0.559 | 0.0 (0.0–0.0)    | 0.976 |
| Hyperlipidemia           |                   |       |                  |       |
| No                       | Reference         |       | Reference        |       |
| Yes                      | 1.59 (0.54–4.65)  | 0.398 | 1.42 (0.46–4.34) | 0.540 |
| Prior antithrombotic use |                   |       |                  |       |
| No                       | Reference         |       | Reference        |       |
| Yes                      | 0.95 (0.38–2.40)  | 0.916 | 1.37 (0.52–3.66) | 0.525 |

PH, parenchymal hematoma; HT, hemorrhagic transformation; HR, hazard ratio; CI, confidence interval; BMI, body mass index; NIHSS, National Institutes of Health Stroke Scale; tPA, tissue plasminogen activator; HU, Hounsfield unit

**Supplemental Table S5.** Uni- and multivariate Cox regression analyses of potential predictive factors for PH-type HT among male patients with cardioembolic stroke

| Variable                                    | Univariate        |       | Multivariate      |       |
|---------------------------------------------|-------------------|-------|-------------------|-------|
|                                             | HR (95% CI)       | p     | HR (95% CI)       | p     |
| Age (per 1-year increase)                   | 1.01 (0.97–1.06)  | 0.664 | 1.01 (0.96–1.07)  | 0.664 |
| BMI (per 1-unit increase)                   | 0.96 (0.84–1.09)  | 0.511 | 0.92 (0.79–1.07)  | 0.277 |
| NIHSS at admission (per 1-point increase)   | 1.08 (1.03–1.13)  | 0.002 | 1.07 (1.00–1.16)  | 0.056 |
| Cerebral infarct volume (per 1 cc increase) | 1.01 (1.00–1.01)  | 0.001 | 1.00 (1.00–1.01)  | 0.126 |
| tPA use                                     |                   |       |                   |       |
| No                                          | Reference         |       | Reference         |       |
| Yes                                         | 2.17 (0.84–5.60)  | 0.110 | 1.24 (0.43–3.57)  | 0.695 |
| Thrombocytopenia at admission               |                   |       |                   |       |
| No                                          | Reference         |       | Reference         |       |
| Yes                                         | 1.18 (0.39–3.58)  | 0.775 | 1.25 (0.39–4.00)  | 0.708 |
| Classification of mean skull HU             |                   |       |                   |       |
| Hypothetical normal                         | Reference         |       | Reference         |       |
| Hypothetical osteopenia                     | 1.71 (0.37–7.97)  | 0.492 | 1.87 (0.36–9.76)  | 0.456 |
| Hypothetical osteoporosis                   | 4.27 (1.59–11.49) | 0.004 | 4.12 (1.40–12.10) | 0.010 |
| Previous stroke history                     |                   |       |                   |       |
| No                                          | Reference         |       | Reference         |       |
| Yes                                         | 0.43 (0.13–1.51)  | 0.188 | 0.68 (0.18–2.67)  | 0.584 |
| Hypertension                                |                   |       |                   |       |
| No                                          | Reference         |       | Reference         |       |
| Yes                                         | 0.92 (0.37–2.34)  | 0.868 | 0.88 (0.31–2.49)  | 0.805 |
| Diabetes                                    |                   |       |                   |       |
| No                                          | Reference         |       | Reference         |       |
| Yes                                         | 0.96 (0.34–2.69)  | 0.938 | 1.05 (0.35–3.16)  | 0.925 |

|                          |                  |       |                  |       |
|--------------------------|------------------|-------|------------------|-------|
| Current smoking          |                  |       |                  |       |
| No                       | Reference        |       | Reference        |       |
| Yes                      | 1.57 (0.61–4.05) | 0.353 | 1.94 (0.59–6.38) | 0.275 |
| Hyperlipidemia           |                  |       |                  |       |
| No                       | Reference        |       | Reference        |       |
| Yes                      | 0.86 (0.20–3.75) | 0.843 | 1.20 (0.23–6.30) | 0.833 |
| Prior antithrombotic use |                  |       |                  |       |
| No                       | Reference        |       | Reference        |       |
| Yes                      | 0.22 (0.03–1.65) | 0.141 | 0.21 (0.02–1.89) | 0.164 |

PH, parenchymal hematoma; HT, hemorrhagic transformation; HR, hazard ratio; CI, confidence interval; BMI, body mass index; NIHSS, National Institutes of Health Stroke Scale; tPA, tissue plasminogen activator; HU, Hounsfield unit



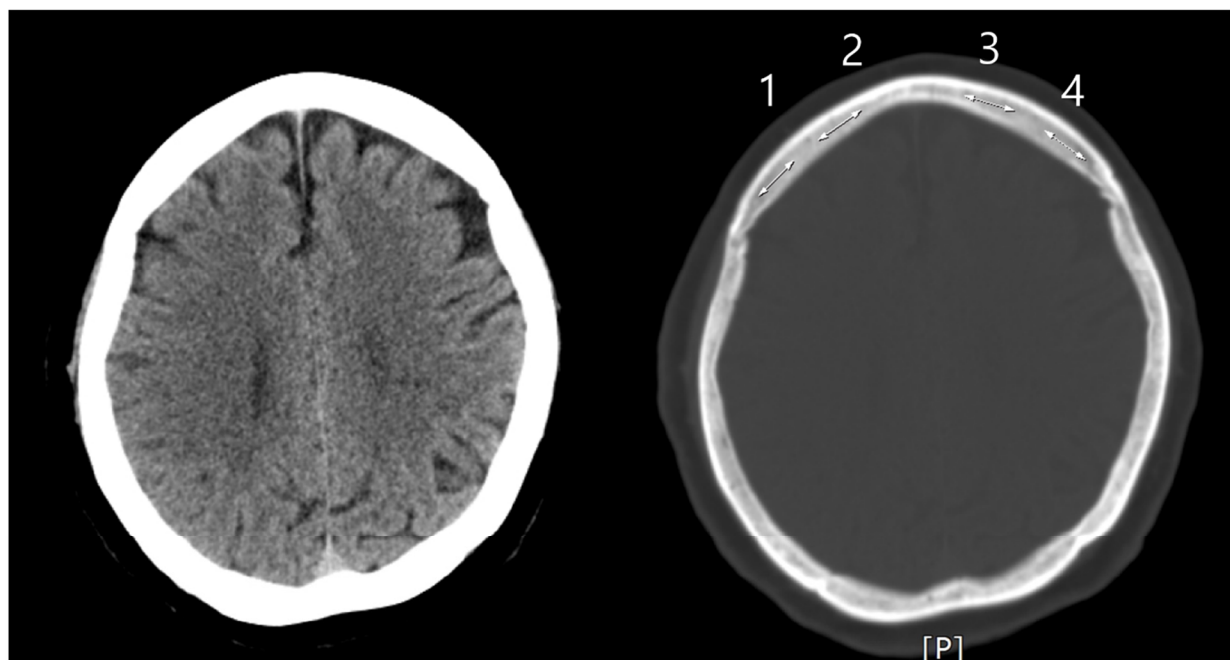

1. Right lateral

2. Right medial

3. Left medial

4. Left lateral

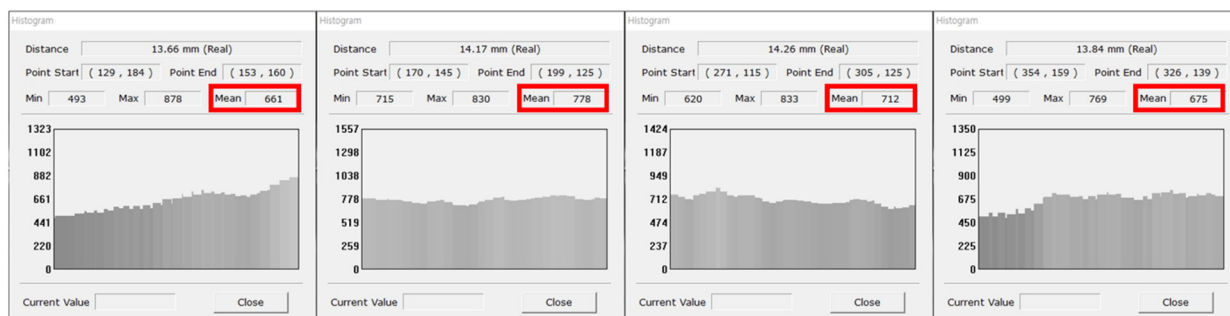

**Supplemental Figure S1.** Measurement of HU values at each of the four lines on the frontal cancellous bone. The mean HU value on each of the four lines was recorded for the analysis. HU=Hounsfield unit.

**A**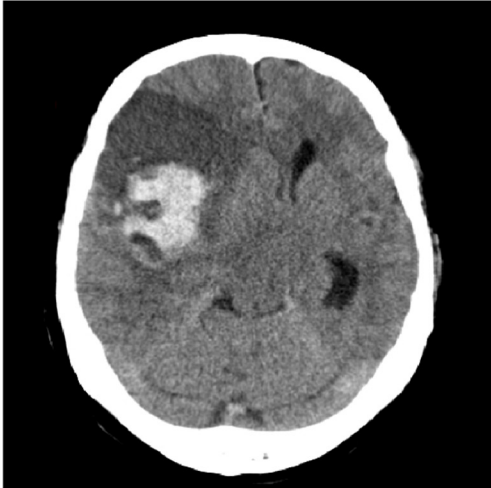**B**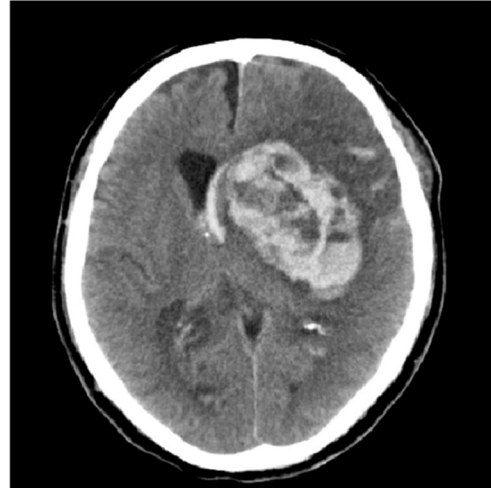

**Supplemental Figure S2.** Examples of PH type 1 and 2 HT in study patients with cardioembolic stroke. (A) PH1; (B) PH2. PH=parenchymal hematoma, HT=hemorrhagic transformation.

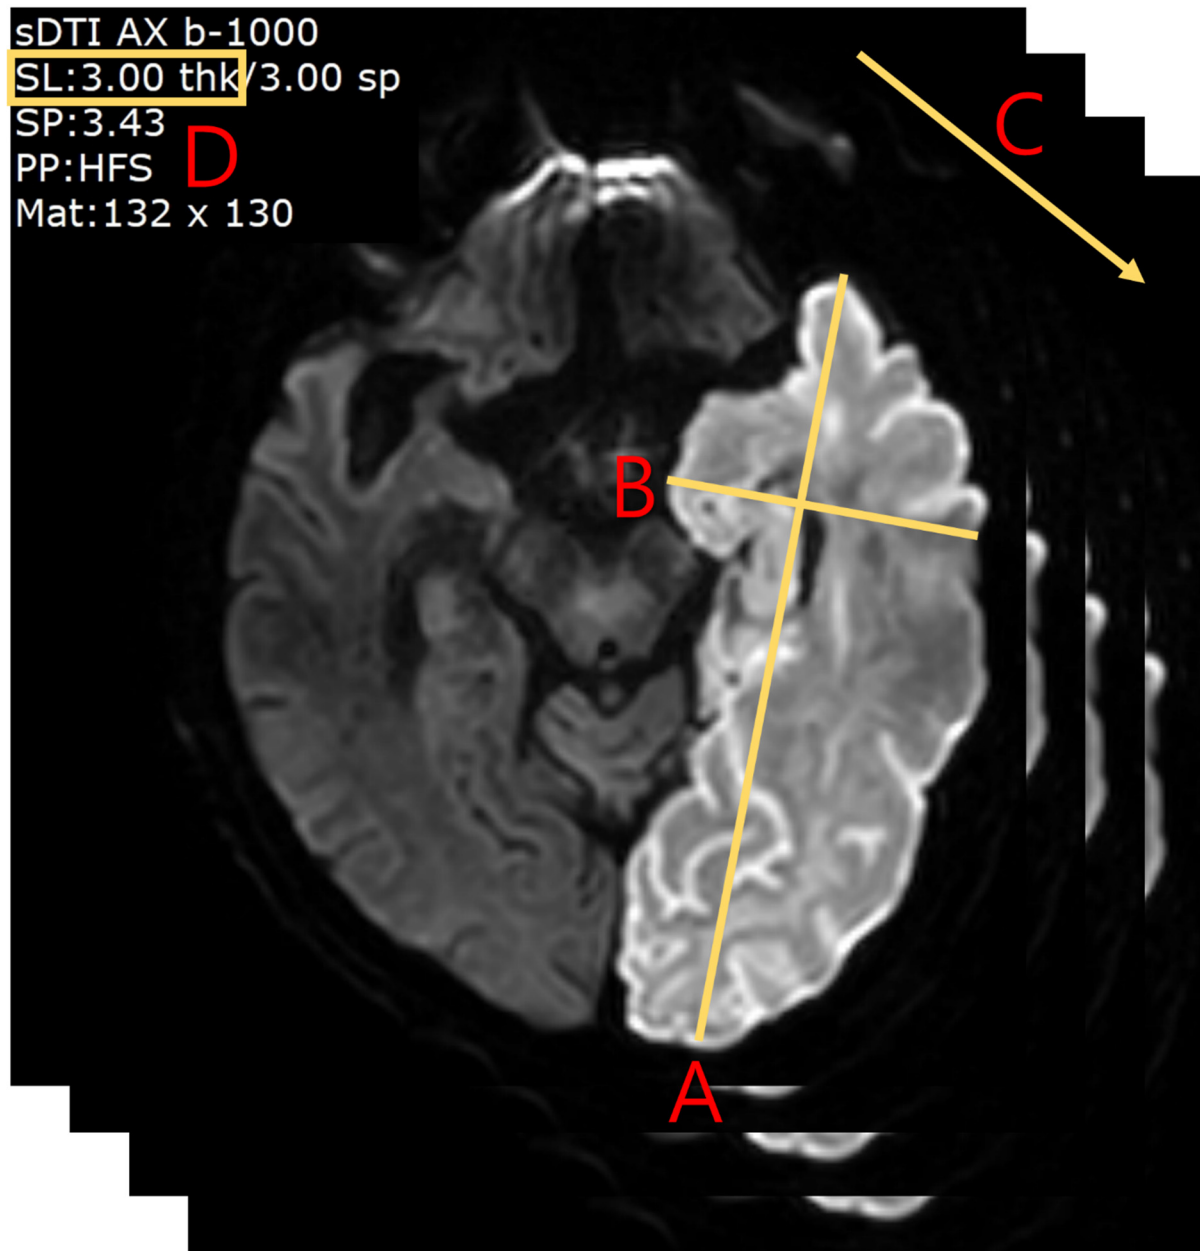

$$\text{Infarction Volume} = \frac{A \times B \times C \times D}{2}$$

**Supplemental Figure S3.** Measurement of the cerebral infarction volume. (A) The maximum diameter of the infarction; (B) largest diameter perpendicular to A; (C) number of images with infarction; (D) slice thickness.

**A**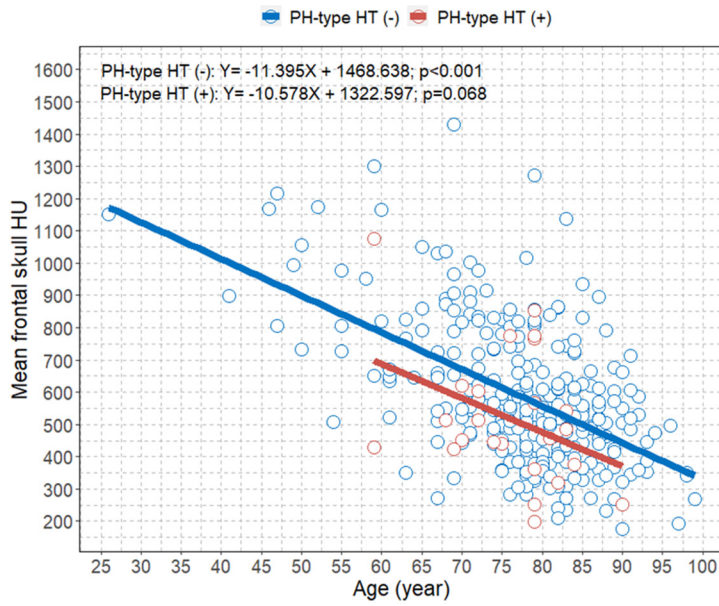**B**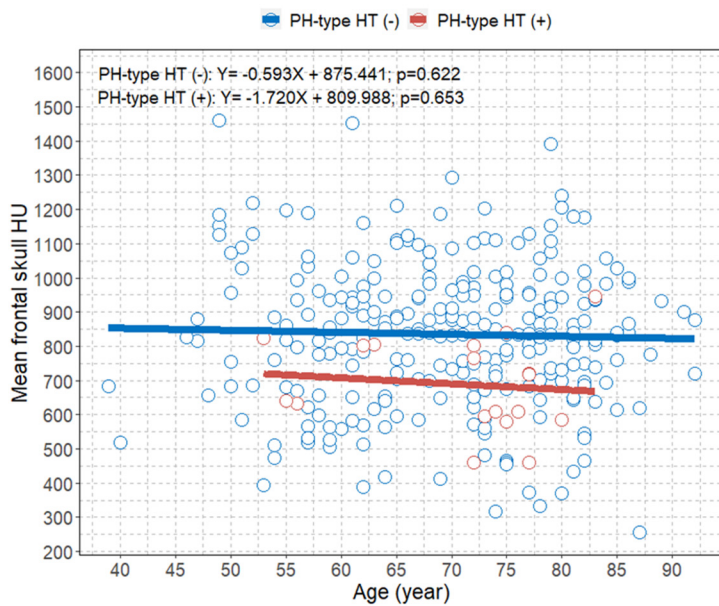

**Supplemental Figure S4.** Scatterplots with linear regression lines. (A) Scatterplot with the linear regression line showing the association between age and mean frontal skull HU values based on the presence of PH-type HT in women; (B) scatterplot with the linear

regression line showing the association between age and mean frontal skull HU values based on the presence of PH-type HT in males. PH=parenchymal hematoma, HT=hemorrhagic transformation, HU=Hounsfield unit.
